1 **Glucocorticoid receptor-mediated amygdalar metaplasticity underlies adaptive**  
2 **modulation of fear memory by stress**

3  
4 Ran Inoue<sup>1\*</sup>, Kareem Abdou<sup>2,5</sup>, Ayumi Hayashi-Tanaka<sup>1</sup>, Shin-ichi Muramatsu<sup>3,4</sup>, Kaori  
5 Mino<sup>1</sup>, Kaoru Inokuchi<sup>2</sup>, Hisashi Mori<sup>1</sup>

6  
7 <sup>1</sup>Department of Molecular Neuroscience, <sup>2</sup>Department of Biochemistry, Graduate  
8 School of Medicine and Pharmaceutical Sciences, University of Toyama, Toyama,  
9 Japan,

10 <sup>3</sup>Division of Neurology, Department of Medicine, Jichi Medical University, Tochigi,  
11 Japan,

12 <sup>4</sup>Center for Gene & Cell Therapy, The Institute of Medical Science, The University of  
13 Tokyo, Tokyo, Japan,

14 <sup>5</sup>Department of Biochemistry, Faculty of Pharmacy, Cairo University, Kasr El-Aini,  
15 Cairo 11562, Egypt

16  
17  
18 \*Correspondence: Ran Inoue, PhD, Department of Molecular Neuroscience, Graduate  
19 School of Medicine and Pharmaceutical Sciences, University of Toyama, Toyama  
20 930-0194, Japan, TEL: +81-76-434-7231, FAX: +81-76-434-5015, E-mail:  
21 [eiran@med.u-toyama.ac.jp](mailto:eiran@med.u-toyama.ac.jp)

22

23

24

25 **Abstract**

26 Glucocorticoid receptor (GR) is crucial for signaling mediated by stress-induced high  
27 levels of glucocorticoids. The lateral nucleus of the amygdala (LA) is a key structure  
28 underlying auditory-cued fear conditioning. Here, we demonstrate that genetic  
29 disruption of GR in the LA (LAGRKO) resulted in an auditory-cued fear memory  
30 deficit for strengthened conditioning. Furthermore, the suppressive effect of a single  
31 restraint stress (RS) prior to conditioning on auditory-cued fear memory in floxed GR  
32 (control) mice was abolished in LAGRKO mice. Optogenetic induction of long-term  
33 depression (LTD) at auditory inputs to the LA reduced auditory-cued fear memory in  
34 RS-exposed LAGRKO mice, and in contrast, optogenetic induction of long-term  
35 potentiation (LTP) increased auditory-cued fear memory in RS-exposed floxed GR  
36 mice. These findings suggest that prior stress suppresses fear conditioning-induced LTP  
37 at auditory inputs to the LA in a GR-dependent manner, thereby protecting animals from  
38 encoding excessive cued fear memory under stress conditions.

39

40

41

42

## 43 **Introduction**

44 Stress activates the hypothalamus–pituitary–adrenal (HPA) axis, which results in the  
45 release of glucocorticoid hormones (cortisol in humans and corticosterone in rodents)  
46 from the adrenal cortex. Glucocorticoid hormones can readily enter the brain and bind  
47 to specific receptors in regions crucial for memories of stressful experiences, such as the  
48 hippocampus and amygdala, thereby enhancing the consolidation of emotionally  
49 arousing events (de Quervain et al., 2009; Roozendaal et al., 2009). Two types of  
50 receptors mediate the effects of glucocorticoids: type I mineralocorticoid receptor (MR,  
51 *Nr3c2*) and type II glucocorticoid receptor (GR, *Nr3c1*). Compared with MR, GR has a  
52 lower binding affinity for glucocorticoids and is largely unoccupied at basal levels, and  
53 is thus considered to be particularly important in signaling mediated by stress-induced  
54 high levels of glucocorticoids (de Kloet et al., 2005; Reul and de Kloet, 1985).

55 The lateral nucleus of the amygdala (LA) is a key structure underlying auditory-cued  
56 fear conditioning (AFC) (LeDoux, 2000). Auditory information, which is critical for  
57 AFC, reaches the LA either from the medial geniculate nucleus (MGN) or from the  
58 auditory cortex (AC). Long-term potentiation (LTP) in the two auditory inputs to the LA  
59 is essential for the acquisition and expression of auditory-cued fear memory (Blair et al.,  
60 2001; Rogan et al., 1997; Tsvetkov et al., 2002). In response to stress, GR activation

61 plays a central role in the formation of long-term memory, which is an essential  
62 mechanism for learning from stressful events and respond adaptively to similar  
63 demands in the future (Finsterswald and Alberini, 2014). In an electrophysiological study  
64 using brain slices, glucocorticoid prolonged excitatory synaptic responses in the  
65 basolateral complex of the amygdala (BLA) by binding to GR (Karst et al., 2010). In  
66 contrast, after an acute stress exposure, application of glucocorticoid suppressed  
67 excitatory synaptic responses in the BLA in a GR-dependent manner. This switch in  
68 synaptic response to glucocorticoid is referred to as metaplasticity (Abraham and Tate,  
69 1997; Schmidt et al., 2013). Prior delivery of behavioral stress has also been shown to  
70 suppress subsequent induction of LTP (Kavushansky and Richter-Levin, 2006).  
71 However, whether stress-induced amygdalar metaplasticity occurs *in vivo* in a way  
72 relevant to the strength of the auditory-cued fear memory, and what role LAGR plays in  
73 this neural process are unknown.

74 In this study, we generated LA-selective GR knockout (LAGRKO) mice to investigate  
75 the region-specific role of LAGR in mediating the modulatory effects of stress on fear  
76 memory. We first compared contextual and auditory-cued fear memory conditioned at  
77 different strengths between floxed GR (control) and LAGRKO mice at basal condition.  
78 We then investigated the effect of LAGR disruption on the adaptive modulation of fear

79 memory after exposure to acute stress. Finally, using an optogenetic technique to induce  
80 LTP and long-term depression (LTD), we investigated how GR-dependent  
81 metaplasticity in the LA influenced auditory-cued fear memory in response to prior  
82 stress exposure.

83

## 84 **Results**

### 85 **Generation of LAGRKO mice**

86 To selectively knockout the GR gene in the LA, we generated two mutant mouse lines.  
87 The knock-in line expressed improved Cre (iCre) recombinase (Shimshek et al., 2002)  
88 under the control of the gastrin-releasing peptide gene (*Grp*) promoter, and the animals  
89 are referred to as Grp-iCre mice (Figure. 1A, B). Grp is abundant in the LA and absent  
90 or present at low levels in other subnuclei of the amygdala (Shumyatsky et al., 2002).  
91 Thus, *Grp* promoter could be used for driving the expression of Cre recombinase  
92 selectively in the LA. To confirm its usefulness, we crossed a Grp-iCre mouse with a  
93 CAG-CAT-Z reporter mouse, which carried the chloramphenicol acetyltransferase gene  
94 (*CAT*) flanked by two loxP sites and the  $\beta$ -galactosidase gene in sequence (Araki et al.,  
95 1995). Cre-mediated recombination between the two loxP sites resulted in the  
96 expression of  $\beta$ -galactosidase, which was detected by X-gal staining. As shown in

97 Figure 1C, strong  $\beta$ -galactosidase expression was detected in the LA and hippocampal  
98 CA3 region of Grp-iCre/CAG-CAT-Z mice, indicating the presence of robust Cre-loxP  
99 recombination in these brain regions. In addition, sparse and weak expression of  
100  $\beta$ -galactosidase appeared in the accessory basal nucleus of the amygdala and in layer 6  
101 of the cerebral cortex.

102 Next, we generated a floxed GR ( $GR^{loxP/loxP}$ ) mouse line in which exon 3 of the GR  
103 gene (encoding the DNA-binding domain) was flanked by two loxP sites  
104 (Supplementary figure 1A, B). Grp-iCre mice were crossed with floxed GR mice to  
105 establish the LAGRKO mouse line ( $GR^{loxP/loxP}$ , Grp-iCre<sup>+/-</sup>). Immunofluorescence  
106 staining with a specific antibody against GR revealed a selective disruption of GR  
107 proteins in the LA of LAGRKO mice (Figure 2A). There was no significant difference  
108 between the two genotypes in the expression level of GR in the central nucleus and  
109 basal nucleus of the amygdala. Double immunofluorescence staining with anti-GR and  
110 anti-NeuN (a neuronal marker) antibodies showed that GR was undetectable in  
111 approximately 70% of LA neurons in LAGRKO mice (floxed GR, 90.88%  $\pm$  1.39%;  
112 LAGRKO, 20.27%  $\pm$  0.95%; Figure 2A, B). The expression level of GR in the  
113 hippocampal CA3 region of floxed GR mice was very low, and it was slightly decreased  
114 in LAGRKO mice (Figure 2C). There was no significant difference between the two

115 genotypes in the expression level of GR in the cerebral cortex, hippocampal CA1 and  
116 CA2 regions, and dentate gyrus (Figure 2C). Collectively, these results indicate the  
117 successful establishment of a novel LAGRKO mouse line.

118

119 **Disruption of LAGR impairs auditory-cued fear memory for strengthened**  
120 **conditioning**

121 Since GR has a low binding affinity for glucocorticoids and its activation requires high  
122 levels of hormones, we investigated the role of LAGR in AFC at different strengths.  
123 After moderate conditioning, which included three CS × US pairings, LAGRKO mice  
124 exhibited the same freezing levels as floxed GR mice during the training, contextual test,  
125 and auditory-cued test (Supplementary figure 2A–D). When the training was  
126 strengthened to six CS × US pairings (Figure 3A), LAGRKO mice exhibited  
127 significantly lower freezing levels than floxed GR mice during tone presentation in the  
128 cued test ( $p = 0.046$ ; Student's  $t$  test; Figure 3D), whereas there were no significant  
129 differences between the two genotypes in freezing levels during the training ( $F_{1,126} =$   
130  $1.19$ ,  $p = 0.278$ ; two-way repeated measures ANOVA; Figure 3B) and contextual test ( $p$   
131  $= 0.803$ ; Student's  $t$  test; Figure 3C). Corticosterone assays revealed significantly higher  
132 plasma corticosterone levels 90 min after training with six CS × US pairings than after

133 training with three CS  $\times$  US pairings in both genotypes (floxed GR,  $p = 0.016$ ;  
134 LAGRKO,  $p < 0.001$ ; Student's  $t$  test; Figure 3E). In the open field test, LAGRKO mice  
135 did not show any alteration in anxiety level or locomotion (Supplementary figure 3A-C),  
136 suggesting that the deficit of auditory-cued fear memory in LAGRKO mice was not the  
137 result of altered anxiety and locomotor activity.

138

139 **Injection of GR-expressing adeno-associated virus into the LA rescues the**  
140 **auditory-cued fear memory deficit in LAGRKO mice**

141 Although we successfully and selectively disrupted GR in the LA of LAGRKO mice,  
142 we cannot exclude the possibility that sparse disruption of GR in other brain areas, such  
143 as the hippocampal CA3 region, may be associated with behavioral impairment in  
144 LAGRKO mice. To confirm that the auditory-cued fear memory deficit can be  
145 specifically attributed to the disruption of LAGR, we performed a rescue experiment by  
146 injecting a GR-expressing adeno-associated virus (AAV-GR) into the LA of LAGRKO  
147 mice. Green fluorescent protein-expressing AAV (AAV-GFP) was used as the control.  
148 Fear conditioning was conducted 4 weeks after virus injection (Figure 4A, B).  
149 LAGRKO mice injected with AAV-GR and floxed GR mice injected with AAV-GFP  
150 exhibited significantly higher freezing levels during the auditory-cued fear memory test



151 than did LAGRKO mice injected with AAV-GFP ( $F_{2,24} = 5.25$ ,  $p = 0.013$ ; one-way  
152 ANOVA followed by *post hoc* Tukey–Kramer test; Figure 4E). There was no significant  
153 difference in freezing levels between the three mouse groups during training ( $F_{2,168} =$   
154  $0.60$ ,  $p = 0.522$ ; two-way repeated measures ANOVA; Figure 4C) and the contextual  
155 fear memory test ( $F_{2,24} = 0.53$ ,  $p = 0.600$ ; one-way ANOVA; Figure 4D). This rescue  
156 experiment further suggests the specific involvement of LAGR in AFC.

157

158 **Disruption of LAGR impairs adaptive modulation of conditioned fear in response**  
159 **to prior restraint stress exposure**

160 Fear conditioning is highly susceptible to modulation by prior stress exposure (Cordero  
161 et al., 2003; Rodriguez Manzanares et al., 2005). To investigate the involvement of  
162 LAGR in mediating the effect of prior stress on subsequent fear conditioning, floxed  
163 GR and LAGRKO mice were exposed to a 20-min restraint stress (RS) and conditioned  
164 1 h later (Figure 5A). Mice were conditioned with three CS  $\times$  US pairings that resulted  
165 in equivalent freezing levels in floxed GR and LAGRKO mice in the contextual and  
166 auditory-cued fear memory tests (Supplementary figure 2). RS exposure 1 h prior to  
167 fear conditioning induced a significant increase in freezing levels during the training  
168 ( $F_{3,215} = 32.25$ ,  $p < 0.001$ ; two-way repeated measures ANOVA; Figure 5B) and

169 contextual memory test ( $F_{3,43} = 5.03$ ,  $p = 0.004$ ; one-way ANOVA followed by *post hoc*  
170 Tukey–Kramer test; Figure 5C) in both floxed GR and LAGRKO mice. In contrast to  
171 the facilitating effect of prior RS exposure on contextual fear memory, RS exposure 1 h  
172 before fear conditioning induced a significant decrease in auditory-cued freezing in  
173 floxed GR mice but not in LAGRKO mice (floxed GR,  $p = 0.016$ ; LAGRKO,  $p =$   
174  $0.951$ ; Student’s *t* test; Figure 5D), suggesting this suppressive effect is  
175 LAGR-dependent.

176

177 **Optogenetic manipulation of metaplasticity in the LA alters the behavioral effect of**  
178 **prior RS exposure on auditory-cued fear memory**

179 We next investigated whether stress-induced changes in synaptic plasticity were  
180 responsible for the effect of prior stress on auditory-cued fear memory in floxed GR and  
181 LAGRKO mice. It was recently proposed that metaplasticity may play a role in the  
182 regulation of learning and memory under stress (Joels et al., 2012; Myers et al., 2014).  
183 Therefore, we hypothesized that prior RS exposure would suppress AFC-induced LTP in  
184 the LA, leading to the attenuation of auditory-cued fear memory in floxed GR mice, and  
185 that LAGR disruption might impair stress-induced metaplasticity in the LA. To test this,  
186 we used a recently established technique that allows engineering a memory using an

187 optical LTP or LTD protocol (Nabavi et al., 2014). We injected an AAV vector  
188 expressing a variant of light-activated channelrhodopsin 2, oChIEF, into bilateral MGN  
189 and AC. Four weeks after virus injection, when oChIEF had reached axon terminals in  
190 the LA, mice were exposed to a RS and conditioned 1 h later (Figure 6A, B).  
191 Immediately after the first auditory-cued fear memory test (Test 1), which was  
192 conducted 24 h after fear conditioning, mice received an optical LTP or LTD protocol  
193 and tested 24 h later (Test2). The optical LTP protocol significantly increased freezing  
194 levels during the Test 2 compared with Test 1 in floxed GR mice but not in LAGRKO  
195 mice (floxed GR,  $p = 0.046$ ; LAGRKO,  $p = 0.811$ ; Student's  $t$  test; Figure 6C, D). These  
196 results support our hypothesis that prior RS exposure suppresses AFC-induced LTP in a  
197 GR-dependent manner, thus resulting in reduced auditory-cued fear memory in floxed  
198 GR mice. In LAGRKO mice, the optical LTD protocol significantly reduced freezing  
199 levels during Test 2 compared with that during Test 1 ( $p = 0.010$ ; Student's  $t$  test; Figure  
200 6E), further supporting the hypothesis that prior stress weakens synaptic strength in the  
201 LA leading to reduced cued fear memory.

202 To confirm that the optical LTP or LTD protocols produced the expected synaptic  
203 effects, we conducted *in vivo* recordings in the LA of anaesthetized naïve mice  
204 expressing oChIEF in auditory regions. Brief light pulses (0.033 Hz) at the recording

205 site produced field responses, which were potentiated by the LTP protocol ( $F_{1,126} =$   
206 174.06,  $p < 0.001$ ; two-way repeated measures ANOVA; Figure 6F) and depressed by  
207 the LTD protocol ( $F_{1,126} = 376.56$ ,  $p < 0.001$ ; two-way repeated measures ANOVA;  
208 Figure 6G). These results suggest that the LTP and LTD protocols used in the behavioral  
209 experiments modify synaptic strength in the expected manner.

210

## 211 **Discussion**

212 In the present study, we demonstrate that LAGR exclusively mediates auditory-cued  
213 fear responses to strengthened conditioning, suggesting a critical role for LAGR in  
214 signaling mediated by stress-induced high levels of glucocorticoids. We further  
215 demonstrate that LAGR is indispensable for the suppressive effect of prior RS exposure  
216 on AFC. The optogenetic manipulation of synaptic strength at auditory inputs to the LA  
217 by an LTP protocol significantly increased auditory-cued fear memory in RS-exposed  
218 floxed GR mice but not in RS-exposed LAGRKO mice. In contrast, an LTD protocol  
219 significantly reduced auditory-cued fear memory in RS-exposed LAGRKO mice. These  
220 findings suggest that stress-induced metaplasticity occurs in the LA in a GR-dependent  
221 manner, and is responsible for the suppressive effect of prior RS on AFC.

222 The degree of stress induced by learning itself has been shown to be  
223 related to strength of the memory (Cordero et al., 1998; Cordero and Sandi, 1998). In  
224 our study, there was no difference in freezing levels between floxed GR and LAGRKO  
225 mice conditioned with three CS × US pairings. When the number of CS × US pairings  
226 of the conditioning procedure was increased to six, LAGRKO exhibited an impaired  
227 auditory-cued fear memory. Concomitantly, in both genotypes, plasma corticosterone  
228 levels 90 min after fear conditioning were significantly higher in the group with six CS  
229 × US pairings than in the group with three CS × US pairings. It is likely that the  
230 increased number of CS × US pairings strengthened the connection between auditory  
231 CS and US in the LA, and LAGR, which is activated by high levels of circulating  
232 corticosterone, contributes exclusively to this neural process. These findings are in  
233 agreement with the lower binding affinity of GR for glucocorticoids, leading to the  
234 critical role of GR in signaling mediated by stress-induced high levels of  
235 glucocorticoids (Reul and de Kloet, 1985).

236 Emerging evidence indicates that stress exposure modulates subsequent learning and  
237 memory bidirectionally, either through facilitation or impairment (Raio and Phelps,  
238 2015). Glucocorticoid signaling has been thought as a common mechanism for  
239 mediating the effects of stress on fear memory (Cordero et al., 2003; Rodriguez

240 Manzanares et al., 2005). In our behavioral tests, a single RS exposure 1 h before  
241 conditioning significantly reduced auditory-cued fear memory in floxed GR mice but  
242 not in LAGRKO mice, suggesting that the suppressive effect of prior RS is  
243 LAGR-dependent. To date, there are no reports demonstrating the effects of stress 1 h  
244 before conditioning on fear memory. One previous report demonstrated that a single  
245 acute stress exposure 48 h before fear conditioning had no effect on AFC (Cordero et al.,  
246 2003). GRs control the magnitude and duration of stress responses, and they are critical  
247 in the negative feedback regulation of the HPA axis in response to acute stress (Laryea  
248 et al., 2015). In our study, plasma corticosterone levels were significantly higher 1 h  
249 after RS than 24 h after RS (data not shown), and it is possible that the timing of  
250 previous stress exposure is a key determinant of the effects of stress on auditory-cued  
251 fear memory. Consistent with our in vivo evidence showing the LAGR-dependent  
252 suppressive effect of prior RS, Karst *et al.* demonstrated that a long-lasting  
253 glutamatergic transmission in BLA neurons triggered by the application of  
254 corticosterone was suppressed by RS 1 h before slice preparation and was attenuated by  
255 treatment with a GR antagonist (Karst et al., 2010).

256 Synaptic changes at auditory inputs to the LA play an essential role in the acquisition  
257 and expression of auditory-cued fear memory (Blair et al., 2001; Rogan et al., 1997;

258 Tsvetkov et al., 2002). Exposure to a single stress induces LTP in the BLA  
259 (Sarabdjitsingh et al., 2012; Vouimba et al., 2004). Therefore, it is possible that prior RS  
260 exposure occludes or suppresses subsequent AFC-induced LTP in floxed GR mice,  
261 thereby preventing the formation of excessive cued fear memory. To test this hypothesis,  
262 we induced LTP at auditory inputs to the LA by optogenetic stimulation, and found a  
263 significant increase in auditory-cued fear responses in RS-exposed floxed GR mice.  
264 This is the first evidence supporting a causal link between stress-induced metaplasticity  
265 in the LA and adaptive fear response to a salient cue in a stressful condition. Several *in*  
266 *vitro* and *in vivo* electrophysiological studies have demonstrated that the activation of  
267 GRs are involved in stress-induced amygdalar metaplasticity (Karst et al., 2010;  
268 Kavushansky and Richter-Levin, 2006). In our study, the optogenetic delivery of an LTP  
269 protocol failed to change fear responses to auditory cues in RS-exposed LAGRKO mice,  
270 supporting the hypothesis that the activation of LAGR is essential for stress-induced  
271 metaplasticity in the LA. Weakening synaptic strength by delivering of an LTD protocol  
272 significantly reduced fear responses to auditory cues in RS-exposed LAGRKO mice,  
273 further suggesting that activation of LAGR after stress exposure suppresses fear  
274 conditioning-induced LTP at auditory inputs to the LA, thereby protecting animals from  
275 encoding excessive cued fear memory under stress condition.

276 This study demonstrated that LAGR is indispensable for stress-induced metaplasticity  
277 in the LA and for controlling fear responses to salient cues depending on the recent  
278 stress history of an animal. Individuals with lower levels of cortisol are more  
279 susceptible to developing post-traumatic stress disorder (PTSD) (Yehuda, 2006; Yehuda  
280 et al., 1998), suggesting that glucocorticoid signaling dysfunction is involved in the  
281 development of PTSD. Our findings contribute to understanding how emotional  
282 memory is formed under stress conditions and provide clues for elucidating the  
283 pathophysiology and etiology of stress-related disorders, such as PTSD.

284

## 285 **Methods**

286 **Construction of *Grp-iCre* targeting vector.** To construct a codon-improved  
287 Cre-recombinase (iCre)-splice gene, the intron sequence from the SV40 t-antigen gene  
288 was amplified by PCR and inserted between codons 283 and 284 of iCre. We obtained  
289 the bacterial artificial chromosome (BAC) clone containing the gastrin-releasing peptide  
290 gene (*Grp*) from the BACPAC Resources Center CHORI (Oakland, CA). Using a  
291 counter-selection BAC modification kit (Gene Bridges, Dresden, Germany), we inserted  
292 the iCre-splice gene linked to the pgk-neo cassette flanked by two FRT sites into *Grp*  
293 gene at the +1 position (+1 corresponding to A of ATG, the initiation site of translation



294 in the *Grp* gene). The modified BAC DNA fragment inserted with the  
295 iCre-splice-pgk-neo cassette and containing the ~5.1 kbp upstream (-5079 to -1) and  
296 ~4.9 kbp downstream (+2 to +4933) sequences of *Grp* gene were cloned into  
297 pMC1DTApMA (Kitayama et al., 2001) to generate the targeting vector pTVGRP-iCre.

298

299 **Construction of  $GR^{loxP}$  targeting vector.** A BAC clone containing the GR gene was  
300 obtained from BACPAC Resources Center CHORI. The 5' arm of ~5.2 kbp (-5344 to  
301 -104, +1 corresponding to the first nucleotide of the exon 3 of the GR gene) and the 3'  
302 arm of ~5 kbp (+104 to +5092) were subcloned into the pDONR P4-P1R and pDONER  
303 P2R-P3 vectors (Invitrogen, Carlsbad, CA), respectively, using the counter-selection  
304 BAC modification kit. A 370 bp GR gene fragment containing exon 3, part of intron 2,  
305 and part of intron 3 was amplified by PCR and was subcloned between two loxP  
306 sequences of a modified pDONR 221 vector containing a pgk-Neo cassette flanked by  
307 two FRT sites. To construct the targeting vector, these three plasmids were directionally  
308 subcloned into pDEST R4-R3 vector containing the diphtheria toxin gene (MC1-DTA)  
309 by MultiSite Gateway LR recombination reaction.

310

311 **ES cell culture and generation of *Grp*-iCre and  $GR^{loxP}$  mice.** The targeting vectors

312 linearized with *NotI* was electroporated into the C57BL/6-derived ES cell line RENKA  
313 (Fukaya et al., 2006) as previously described. After the selection with G418 (150  
314  $\mu\text{g}/\text{mL}$ ), the recombinant ES cell clone was identified by Southern blot analysis. The  
315 obtained recombinant ES cells were injected into 8-cell-stage embryos of ICR mice.  
316 The embryos were cultured to blastocysts and transferred to the uterus of  
317 pseudopregnant ICR mice. The resulting chimeric mice were mated with CAG-FLPe  
318 mice (provided by RIKEN BRC through the National Bio-Resource Project of the  
319 MEXT, Japan) to delete the *pgk-neo* gene and establish the mutant mouse line. Grp-iCre  
320 and GR<sup>loxP</sup> mice were genotyped using polymerase chain reaction (PCR) amplification  
321 of genomic DNA prepared from the mouse tail. The Grp-iCre mice were genotyped  
322 using the following primer sequences: Gic1, 5'-GTCGAGAGCTCTGAGGGTTT-3';  
323 Gic2, 5'-GATTCATGATCGGGACACTTACCCA-3'; Gic3,  
324 5'-GGTACAGGAGGTAGTCCCTCACATC-3'; NeoP1,  
325 5'-GGGGATCCACTAGCGAATTCGAAG-3'; and NeoP2,  
326 5'-GGATCCCCTCAGAAGAAGACTCGTCAA-3'. The GR<sup>loxP</sup> mice were genotyped  
327 using the following primer sequences: GR3'LU,  
328 5'-AAAAGAGCAGTGGAAGGTAGTGTG-3' and GR3'LL,  
329 5'-TACTTCTGTCCCTTCCCAATGGAG-3'.

330 Animal care and experimental protocols were approved by the Animal Experiment  
331 Committee of the University of Toyama (Authorization No. 2013 MED-18 and  
332 MED-68) and carried out in accordance with the Guidelines for the Care and Use of  
333 Laboratory Animal of the University of Toyama. Three month-old male mice were used  
334 for analyses in a genotype blind manner. The mice were kept in a temperature- and  
335 humidity-controlled room under 12 h light/dark cycle (lights on at 7:00 AM) and had ad  
336 libitum access to food and water.

337

338 **Analysis of Cre-mediated recombination efficacy.** We used the mutant mice carrying  
339 both *Grp-iCre* and *CAG-CAT-Z* transgene heterozygously as the reporter mice. The  
340 mice were deeply anesthetized with pentobarbital sodium (100 mg/kg body weight,  
341 intraperitoneal injection), and then transcardially perfused with phosphate buffered  
342 saline (PBS, pH 7.4) followed by 4% paraformaldehyde (PFA) in 0.1 M phosphate  
343 buffer (PB). Brains were removed, post-fixed with the 4% PFA overnight, and dipped in  
344 0.1 M PB containing 30% sucrose for 36 h at 4°C. The brains were cut into 1-mm-thick  
345 coronal sections and stained for  $\beta$ -galactosidase ( $\beta$ -gal) activity for 18 h in PBS  
346 containing 5 mM potassium hexacyanoferrate (III), 5 mM potassium hexacyanoferrate  
347 (II), 2 mM  $MgCl_2$ , and 1 mg/ml 5-bromo-4-chloro-3-indolyl- $\beta$ -D-galactoside (Tsujita et

348 al., 1999). After the staining reaction, 20- $\mu$ m-thick sections were prepared from  
349 1-mm-thick sections and mounted on glass slides. Images were obtained using a  
350 Keyence BZ-8000 microscope (Keyence, Osaka, Japan).

351

352 **Immunofluorescence staining.** The brains were removed, fixed, and cryoprotected as  
353 described above and then cut into 25- $\mu$ m-thick serial coronal sections using a freezing  
354 microtome. For each animal, every fourth section (bregma from -1.4 to -1.8 mm, 5  
355 sections per animal) was selected on the basis of the Mouse Brain in Stereotaxic  
356 Coordinates (Paxinos and Franklin, 2001) and was prepared for immunofluorescence  
357 staining.

358 Free floating brain sections were rinsed with PBS and blocked with Protein Block  
359 Serum Free (DAKO Cytomation, Carpinteria, CA) for 10 min at room temperature. The  
360 sections were then incubated with primary antibodies (rabbit anti-GR, 1:100, Santa Cruz  
361 #H-300; mouse anti-NeuN, 1:100, Chemicon #MAB377) diluted in PBS containing 1%  
362 bovine serum albumin (BSA) overnight at 4°C. After washing with PBS, the sections  
363 were incubated with Alexa-Fluor-488- and Alexa-Fluor-594-conjugated species-specific  
364 secondary antibodies (Invitrogen) for 1 h at room temperature. Then, the sections were  
365 washed with PBS, adhered to glass slides and coverslipped. Images were taken using a

366 confocal laser scanning microscope (Leica TCS-SP5, Leica Microsystems, Germany).

367 Three sections per animal were used for quantification of GR-positive and

368 NeuN-positive cells in the LA. All sections were counted by us who were blind to the

369 genotype of the mice.

370

371 **Auditory-cued fear conditioning.** Except for the optogenetic experiment,

372 auditory-cued fear conditioning (AFC) was conducted in a small conditioning chamber

373 (10 × 10 × 10 cm; with transparent walls and a floor made of 14 stainless steel rods)

374 surrounded by a sound-attenuating chest (CL-M3, O'Hara & Co., Ltd, Tokyo, Japan).

375 Mice were placed in the conditioning chamber for 60 s and then presented with a 30-s

376 tone (65 dB, white noise) through a speaker on the ceiling of the sound-attenuating

377 chamber. At the end of the tone presentation, mice were given a foot shock (0.5 mA, 2 s

378 for three CS × US pairings and 0.5 mA, 1 s for six CS × US pairings). Mice were

379 returned to their home cages 30 s after the last foot shock. The contextual and

380 auditory-cued fear memory retention tests were conducted 24 and 48 h after training,

381 respectively. During the contextual memory test, mice were re-exposed to the

382 conditioning chamber for 5 min without the tone and shock presentation. The

383 conditioning chamber was cleaned with 70% ethanol before each trial. For the

384 auditory-cued memory test, mice were placed in a novel chamber ( $10 \times 10 \times 10$  cm,  
385 with white walls and a flat floor). Freezing was scored for 3 min before delivery of the  
386 tone and then scored for 3 min in the presence of the tone. Before each trial, the  
387 chamber was cleaned with 4% acetic acid. Freezing responses were analyzed on a  
388 Macintosh computer with Image FZC 2.22sr2 (O'Hara & Co., Japan), which is software  
389 based on the NIH Image program.

390 For the optogenetic experiment, mice were anaesthetized with isoflurane and optic  
391 fibers were inserted into guide cannulas. Mice were returned to their home cages and  
392 left for at least 1 h before AFC. AFC was conducted in a soundproof experimental room  
393 (Yamada Co., Japan). Mice were placed in the square conditioning chamber ( $17.5 \times$   
394  $30$  cm, with a transparent front wall, white side and back walls, and a floor of 26  
395 stainless steel rods) for 60 s and then received three pairings of CS (65 dB, 7 kHz, 30 s  
396 tone) and US (0.5 mA, 2 s foot shock) with 1 min inter-pairing interval. Mice were  
397 returned to their home cages 90 s after the last foot shock. The first auditory-cued fear  
398 memory test (Test 1) was conducted in a circular chamber (opaque black walls, diameter  
399  $21.5$  cm  $\times$  height  $34$  cm, with a flat floor) 24 h after conditioning. Immediately after  
400 Test 1, mice received the optical LTP or LTD protocol and 24 h later, the second  
401 auditory-cued fear memory test (Test 2) was conducted in a novel circular chamber

402 (opaque reddish walls, diameter 23.5 cm × height 22.5 cm, with a flat floor). Freezing  
403 was scored for 3 min before delivery of the tone and then scored for 3 min in the  
404 presence of the tone.

405

406 **Open field test.** The open field test was performed to measure locomotion and anxiety  
407 in a novel open field using SCANET MV-40 (MELQUEST Co., Toyama Japan). The  
408 open field consisted of a square box of 48 cm per side with infrared sensors arranged at  
409 6-mm intervals for the automatic detection of activity. Individual mice were placed at  
410 the center of the open field at the initiation of the test session and allowed to freely  
411 explore the field for 15 min.

412

413 **Restraint stress.** Mice were placed in an adequately ventilated 50-mL plastic tube  
414 (FALCON) for 20 min. They could rotate from a prone to supine position and back  
415 again but not turn head to tail.

416

417 **Corticosterone measurements.** Plasma was extracted from blood samples collected  
418 from the heart. All blood samples were collected between 2 and 4 p.m. Blood samples  
419 were centrifuged at 3,000 rpm for 5 min at 4 °C and extracted plasma was stored at

420  $-30^{\circ}\text{C}$  until assayed for corticosterone using a corticosterone enzyme immunoassay kit  
421 (Arbor Assays, Ann Arbor, MI) in accordance with the manufacturer's instructions.  
422  
423 **Viral vector.** The GR-expressing adeno-associated virus (AAV-GR) and green  
424 fluorescent protein-expressing AAV (AAV-GFP) plasmids consisted of the mouse  
425 synapsin I promoter followed by cDNA encoding GR or the GFP and a woodchuck  
426 hepatitis virus post-transcriptional regulatory element between the inverted terminal  
427 repeats of the AAV3 genome. Plasmid AAV-hsyn-oChIEF-tdTomato was purchased  
428 from Addgene (Cambridge, MA). Recombinant AAV vectors were produced by  
429 transient transfection of HEK293 cells with the vector plasmid, an AAV3 rep and  
430 AAV9 vp expression plasmid, and an adenoviral helper plasmid, pHelper (Agilent  
431 Technologies, Santa Clara, CA), as previously described (Iida et al., 2013; Li et al.,  
432 2006). Recombinant viruses were purified by isolation from two sequential continuous  
433 CsCl gradients, and the viral titers were determined by qRT-PCR. Before administration,  
434 AAV-GR and AAV-GFP vectors were diluted in phosphate-buffered saline to  $5 \times 10^{11}$   
435 genome copies/100  $\mu\text{L}$  and  $1 \times 10^{11}$  genome copies/100  $\mu\text{L}$ , respectively.  
436  
437 **Surgery.** Mice were deeply anesthetized with pentobarbital sodium (100 mg/kg body



438 weight, intraperitoneal injection) and placed in a stereotactic frame (Narishige, Tokyo,  
439 Japan). AAV-GR or AAV-GFP (0.3  $\mu$ L per hemisphere) was bilaterally injected into the  
440 LA (AP: -1.7 mm; ML: 3.3 mm; DV: -4.1 to -4.2 mm) using glass pipettes (tip  
441 diameter 50  $\mu$ m) connected to a compatible syringe and motorized microinjector  
442 (Narishige IMS-10). Mice were allowed to recover in their home cages for 4 weeks  
443 before behavioral experiments.

444 For optogenetic experiments, AAV-hsyn-oChIEF-tdTomato was bilaterally injected  
445 into the medial geniculate nucleus (AP: -3.1 mm; ML: 1.9 mm; DV: -3.5 mm) and the  
446 auditory cortex (AP: -2.7 mm; ML: 4.4 mm; DV: -3.3 mm). A total of 0.5  $\mu$ L virus per  
447 hemisphere was injected. An optic fiber cannula was implanted just above the dorsal tip  
448 of the LA (AP: -1.7 mm; ML: 3.4 mm; DV: -4.1 mm) and secured to the skull with  
449 screws and dental cement.

450

451 ***In vivo* LTP or LTD induction.** Optical LTP was induced with 10 trains of light (each  
452 train consisted of 100 pulses of light, 5 ms each, at 100 Hz) at 90-s inter-train intervals.  
453 Optical LTD was induced with 900 pulses of light, 2 ms each, at 1 Hz. After induction,  
454 mice were immediately returned to their home cages.

455

456 ***In vivo* recording.** Eight weeks after the injection of AAV-hsyn-oChIEF-tdTomato into  
457 the MGN and AC, mice were anesthetized with pentobarbital sodium and then mounted  
458 on a stereotaxic frame. The optic fiber was glued to the recording electrode so that the  
459 tip of the fiber was 500  $\mu\text{m}$  above the tip of the electrode. The optrode was inserted into  
460 the LA and the optic fiber was connected to a 473-nm laser unit. The LTP or LTD  
461 induction protocol was identical to those used in the behavioral test. After establishing a  
462 stable baseline at the recording site for 21 min (stimulation frequency at 0.033 Hz), *in*  
463 *vivo* LTP or LTD was induced, which was followed by at least 21 min of 0.033 Hz  
464 stimulation. Data were analyzed using Clampex 10.7 software. All animals were  
465 perfused after the recordings and the position of the recording sites were verified.

466

467 **Statistical analysis.** Statistical analysis was performed using student's *t*-test for the  
468 comparison of two groups and one-way ANOVA was used for analyzing experiments  
469 consisting of multiple groups. Two-way repeated measures ANOVA was used for  
470 analyzing the freezing level during training sessions. Significant ANOVA results were  
471 followed by a *post hoc* Tukey–Kramer test for multiple comparisons. All values are  
472 presented as mean  $\pm$  S. E. M. Values of  $p < 0.05$  were considered statistically  
473 significant.

474 Statistical analysis was performed using Statcel2. Mice were randomly assigned to  
475 experimental groups prior to experimentation. No statistical methods were used to  
476 pre-determine sample sizes but our sample sizes are similar to those generally employed  
477 in the field. Animals with viral injections off target or damage during the experiment  
478 were excluded from the statistical analysis.

479

#### 480 **Acknowledgements**

481 We thank Dr. R. Sprengel for providing the plasmid containing iCre and Dr. J.  
482 Miyazaki for providing the CAG-CAT-Z mice. CAG-FLPe mice were provided by the  
483 RIKEN BRC through the National Bio-Resource Project of the MEXT, Japan. We thank  
484 M. Ito and N. Takiko (Jichi Medical University) for their help with production of the  
485 AAV vectors. This work was supported by Grant-in-Aid for Scientific Research on  
486 Innovative Areas Nos. 221S0003, 15H01279, 25116508, and JP25115002, Grant-in-Aid  
487 for Young Scientists (B) Nos.25830005 and 26293213, a Grant-in-Aid for Scientific  
488 Research (C) No. 15K06705 from the Ministry of Education, Culture, Sports, Science  
489 and Technology of Japan, a grant from the Japan Agency for Medical Research and  
490 Development (AMED), and a grant from the Core Research for Evolutional Science and  
491 Technology (CREST) program (JPMJCR13W1) of the Japan Science and Technology

492 Agency (JST).

493

494 **Competing financial interests**

495 S.M. own equity in a gene therapy company (Gene Therapy Research Institution) that  
496 commercializes the use of AAV vectors for gene therapy applications. To the extent that  
497 the work in this manuscript increases the value of these commercial holdings, S.M. has  
498 a conflict of interest. The remaining authors declare no competing financial interests.

499

500

501

502

503

504

505

506

507

508

509

510 **References**

- 511 Abraham WC, Tate WP. 1997. Metaplasticity: a new vista across the field of synaptic  
512 plasticity. *Prog Neurobiol* **52**: 303-323.
- 513 Araki K, Araki M, Miyazaki J, Vassalli P. 1995. Site-specific recombination of a  
514 transgene in fertilized eggs by transient expression of Cre recombinase. *Proc Natl Acad*  
515 *Sci U S A* **92**: 160-164.
- 516 Blair HT, Schafe GE, Bauer EP, Rodrigues SM, LeDoux JE. 2001. Synaptic plasticity in  
517 the lateral amygdala: a cellular hypothesis of fear conditioning. *Learn Mem* **8**: 229-242.
- 518 Cordero MI, Merino JJ, Sandi C. 1998. Correlational relationship between shock  
519 intensity and corticosterone secretion on the establishment and subsequent expression of  
520 contextual fear conditioning. *Behav Neurosci* **112**: 885-891.
- 521 Cordero MI, Sandi C. 1998. A role for brain glucocorticoid receptors in contextual fear  
522 conditioning: dependence upon training intensity. *Brain Res* **786**: 11-17.
- 523 Cordero MI, Venero C, Kruyt ND, Sandi C. 2003. Prior exposure to a single stress  
524 session facilitates subsequent contextual fear conditioning in rats. Evidence for a role of  
525 corticosterone. *Horm Behav* **44**: 338-345.
- 526 de Kloet ER, Joels M, Holsboer F. 2005. Stress and the brain: from adaptation to disease.  
527 *Nat Rev Neurosci* **6**: 463-475.

528 de Quervain DJ, Aerni A, Schelling G, Roozendaal B. 2009. Glucocorticoids and the  
529 regulation of memory in health and disease. *Front Neuroendocrinol* **30**: 358-370.

530 Finsterwald C, Alberini CM. 2014. Stress and glucocorticoid receptor-dependent  
531 mechanisms in long-term memory: from adaptive responses to psychopathologies.  
532 *Neurobiol Learn Mem* **112**: 17-29.

533 Fukaya M, Tsujita M, Yamazaki M, Kushiya E, Abe M, Akashi K, Natsume R, Kano M,  
534 Kamiya H, Watanabe M, Sakimura K. 2006. Abundant distribution of TARP  $\gamma$ -8 in  
535 synaptic and extrasynaptic surface of hippocampal neurons and its major role in AMPA  
536 receptor expression on spines and dendrites. *Eur. J. Neurosci.* **24**: 2177-2190.

537 Iida A, Takino N, Miyauchi H, Shimazaki K, Muramatsu S. 2013. Systemic delivery of  
538 tyrosine-mutant AAV vectors results in robust transduction of neurons in adult mice.  
539 *Biomed Res Int* **2013**: 974819.

540 Joels M, Sarabdjitsingh RA, Karst H. 2012. Unraveling the time domains of  
541 corticosteroid hormone influences on brain activity: rapid, slow, and chronic modes.  
542 *Pharmacol Rev* **64**: 901-938.

543 Karst H, Berger S, Erdmann G, Schutz G, Joels M. 2010. Metaplasticity of amygdalar  
544 responses to the stress hormone corticosterone. *Proc Natl Acad Sci U S A* **107**:  
545 14449-14454.

- 546 Kavushansky A, Richter-Levin G. 2006. Effects of stress and corticosterone on activity  
547 and plasticity in the amygdala. *J Neurosci Res* **84**: 1580-1587.
- 548 Kitayama K, Abe M, Kakizaki T, Honma D, Natsume R, Fukaya M, Watanabe M. 2001.  
549 Purkinje cell-specific and inducible gene recombination system generated from  
550 C57BL/6 mouse ES cells. *Biochem Biophys Res Commun* **281**: 1134-1140.
- 551 Laryea G, Muglia L, Arnett M, Muglia LJ. 2015. Dissection of glucocorticoid  
552 receptor-mediated inhibition of the hypothalamic-pituitary-adrenal axis by gene  
553 targeting in mice. *Front Neuroendocrinol* **36**: 150-164.
- 554 LeDoux JE. 2000. Emotion circuits in the brain. *Annu Rev Neurosci* **23**: 155-184.
- 555 Li XG, Okada T, Kodera M, Nara Y, Takino N, Muramatsu C, Ikeguchi K, Urano F,  
556 Ichinose H, Metzger D, Chambon P, Nakano I, Ozawa K, Muramatsu S. 2006.  
557 Viral-mediated temporally controlled dopamine production in a rat model of Parkinson  
558 disease. *Mol Ther* **13**: 160-166.
- 559 Miyazaki J, Mishina M, Sakimura K. 2001. Purkinje cell-specific and inducible gene  
560 recombination system generated from C57BL/6 mouse ES cells. *Biochem. Biophys. Res.*  
561 *Commun.* **281**: 1134-1140.
- 562 Myers B, McKlveen JM, Herman JP. 2014. Glucocorticoid actions on synapses, circuits,  
563 and behavior: implications for the energetics of stress. *Front Neuroendocrinol* **35**:

564 180-196.

565 Nabavi S, Fox R, Proulx CD, Lin JY, Tsien RY, Malinow R. 2014. Engineering a  
566 memory with LTD and LTP. *Nature* **511**: 348-352.

567 Paxinos G, Franklin KBJ. 2001. The Mouse Brain in Stereotaxic Coordinates. *Academic*  
568 *Press*.

569 Raio CM, Phelps EA. 2015. The influence of acute stress on the regulation of  
570 conditioned fear. *Neurobiol Stress* **1**: 134-146.

571 Reul JM, de Kloet ER. 1985. Two receptor systems for corticosterone in rat brain:  
572 microdistribution and differential occupation. *Endocrinology* **117**: 2505-2511.

573 Rodriguez Manzanares PA, Isoardi NA, Carrer HF, Molina VA. 2005. Previous stress  
574 facilitates fear memory, attenuates GABAergic inhibition, and increases synaptic  
575 plasticity in the rat basolateral amygdala. *J Neurosci* **25**: 8725-8734.

576 Rogan MT, Staubli UV, LeDoux JE. 1997. Fear conditioning induces associative  
577 long-term potentiation in the amygdala. *Nature* **390**: 604-607.

578 Roozendaal B, McEwen BS, Chattarji S. 2009. Stress, memory and the amygdala. *Nat*  
579 *Rev Neurosci* **10**: 423-433.

580 Sarabdjitsingh RA, Kofink D, Karst H, de Kloet ER, Joels M. 2012. Stress-induced  
581 enhancement of mouse amygdalar synaptic plasticity depends on glucocorticoid and



- 582 ss-adrenergic activity. *PLoS One* **7**: e42143.
- 583 Schmidt MV, Abraham WC, Maroun M, Stork O, Richter-Levin G. 2013. Stress-induced  
584 metaplasticity: from synapses to behavior. *Neuroscience* **250**: 112-120.
- 585 Shimshek DR, Kim J, Hubner MR, Spergel DJ, Buchholz F, Casanova E, Stewart AF,  
586 Seeburg PH, Sprengel R. 2002. Codon-improved Cre recombinase (iCre) expression in  
587 the mouse. *Genesis* **32**: 19-26.
- 588 Shumyatsky GP, Tsvetkov E, Malleret G, Vronskaya S, Hatton M, Hampton L, Battey JF,  
589 Dulac C, Kandel ER, Bolshakov VY. 2002. Identification of a signaling network in  
590 lateral nucleus of amygdala important for inhibiting memory specifically related to  
591 learned fear. *Cell* **111**: 905-918.
- 592 Tsujita M, Mori H, Watanabe M, Suzuki M, Miyazaki J, Mishina M. 1999. Cerebellar  
593 granule cell-specific and inducible expression of Cre recombinase in the mouse. *J.*  
594 *Neurosci.* **19**: 10318-10323.
- 595 Tsvetkov E, Carlezon WA, Benes FM, Kandel ER, Bolshakov VY. 2002. Fear  
596 conditioning occludes LTP-induced presynaptic enhancement of synaptic transmission  
597 in the cortical pathway to the lateral amygdala. *Neuron* **34**: 289-300.
- 598 Vouimba RM, Yaniv D, Diamond D, Richter-Levin G. 2004. Effects of inescapable  
599 stress on LTP in the amygdala versus the dentate gyrus of freely behaving rats. *Eur J*

600 *Neurosci* **19**: 1887-1894.

601 Yehuda R. 2006. Advances in understanding neuroendocrine alterations in PTSD and  
602 their therapeutic implications. *Ann N Y Acad Sci* **1071**: 137-166.

603 Yehuda R, McFarlane AC, Shalev AY. 1998. Predicting the development of  
604 posttraumatic stress disorder from the acute response to a traumatic event. *Biol*  
605 *Psychiatry* **44**: 1305-1313.

606

607

608

609

610

611

612

613

614

615

616

617

**Figure 1**

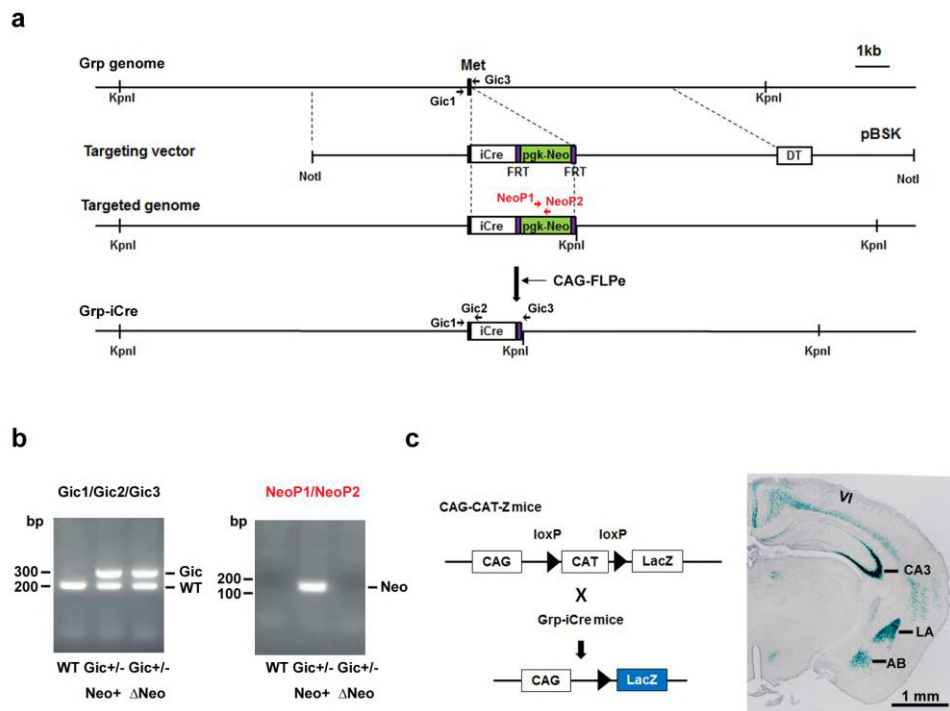

618

619 **Figure 1.** Generation and characterization of Grp-iCre mice. (A) Schematic diagram of

620 the gene targeting strategy. iCre and pgk-neo cassettes flanked by two FRT sites were

621 inserted into the gastrin-releasing peptide gene (*Grp*) locus. Met is the translation

622 initiation site of *Grp*. The location of PCR primers (Gic1, Gic2, Gic3, NeoP1, and

623 NeoP2) used for genotyping are indicated. DT, diphtheria toxin gene; pBSK,

624 pBluescriptII SK. The chimeric mouse obtained was crossed with a CAG-FLPe mouse

625 to delete the pgk-neo cassette and establish the Grp-iCre (Gic) mouse line. (B)

626 Genotyping PCR of genomic DNA prepared from WT; Gic<sup>+/-</sup>, Neo<sup>+</sup>; Gic<sup>+/-</sup>, and ΔNeo

627 mice. (C) Cre activity in Grp-iCre mice was examined by crossing Grp-iCre mice with

628 lacZ reporter mice (CAG-CAT-Z) mice.  $\beta$ -galactosidase expression in a  
629 Grp-iCre/CAG-CAT-Z mouse stained with X-gal. X-gal staining revealed robust  
630 Cre-loxP recombination in the lateral nucleus of the amygdala (LA) and the  
631 hippocampal CA3 region, with sparser recombination in the accessory basal nucleus of  
632 the amygdala (AB), and in layer 6 of the cerebral cortex (VI).

633

634

635

636

637

638

639

640

641

642

643

644

645

## Figure 2

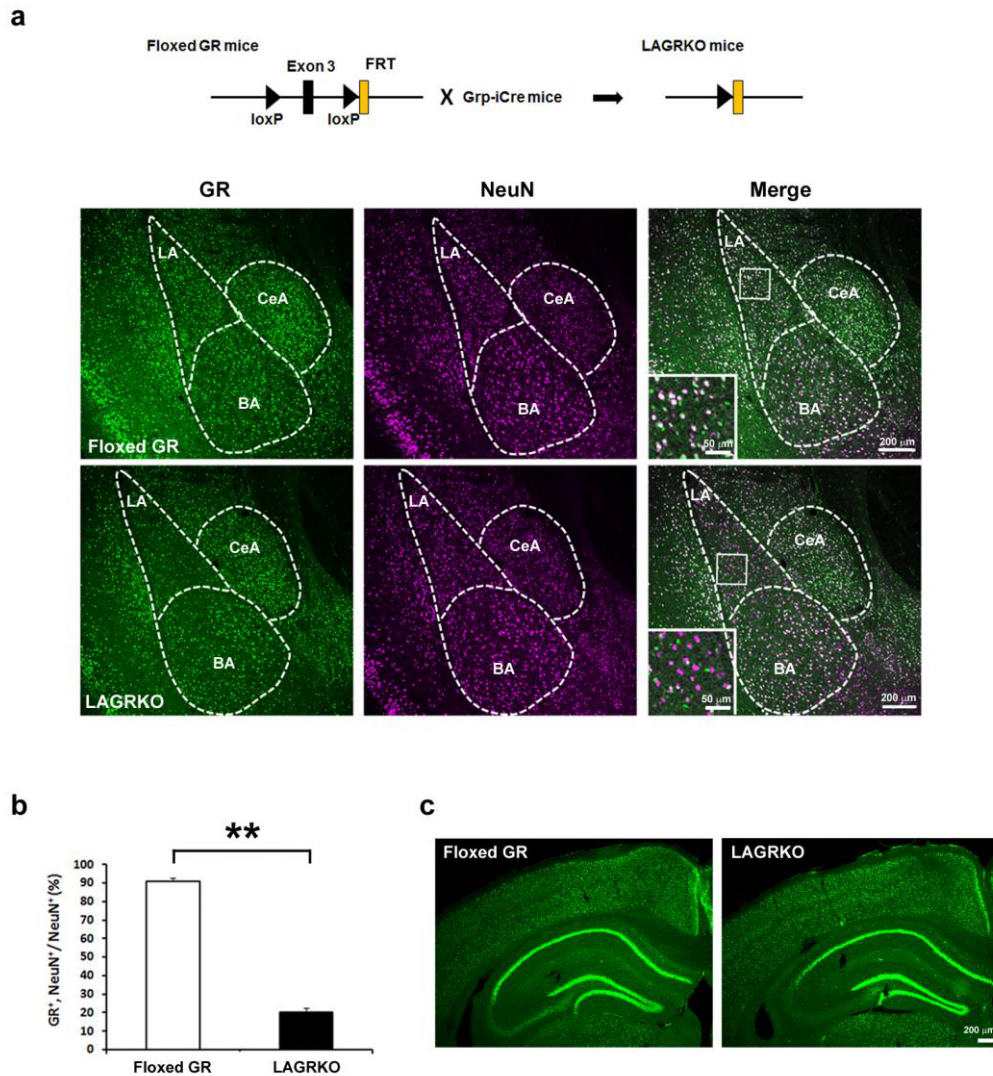

646

647 **Figure 2.** Generation and characterization of lateral amygdala (LA)-selective

648 glucocorticoid receptor (GR) knockout (LAGRKO) mice. (A) The LAGRKO mouse

649 line (GR<sup>flox/flox</sup>, Grp-iCre<sup>+/-</sup>) was established by crossing floxed GR (GR<sup>flox/flox</sup>) and

650 Grp-iCre mice. Double immunofluorescence staining of GR (green, left panels) and

651 NeuN (magenta, middle panels) in coronal brain sections from floxed GR and

652 LAGRKO mice. The overlap of green and magenta signals (white, right panels)  
653 indicates the expression of GR in LA neurons in floxed GR mice (upper), which was  
654 apparently reduced in LAGRKO mice (lower). Magnified images of the boxed areas are  
655 shown in the insets. LA, lateral nucleus of the amygdala; BA, basal nucleus of the  
656 amygdala; CeA, central nucleus of the amygdala. **(B)** Quantification of GR<sup>+</sup> and NeuN<sup>+</sup>  
657 cells in the LA of floxed GR and LAGRKO mice (n = 9 sections from 3 mice). Data are  
658 presented as mean ± S.E.M. \*\**p* < 0.001. **(C)** Expression of GR in the cerebral cortex  
659 and hippocampus.

**Figure 3**

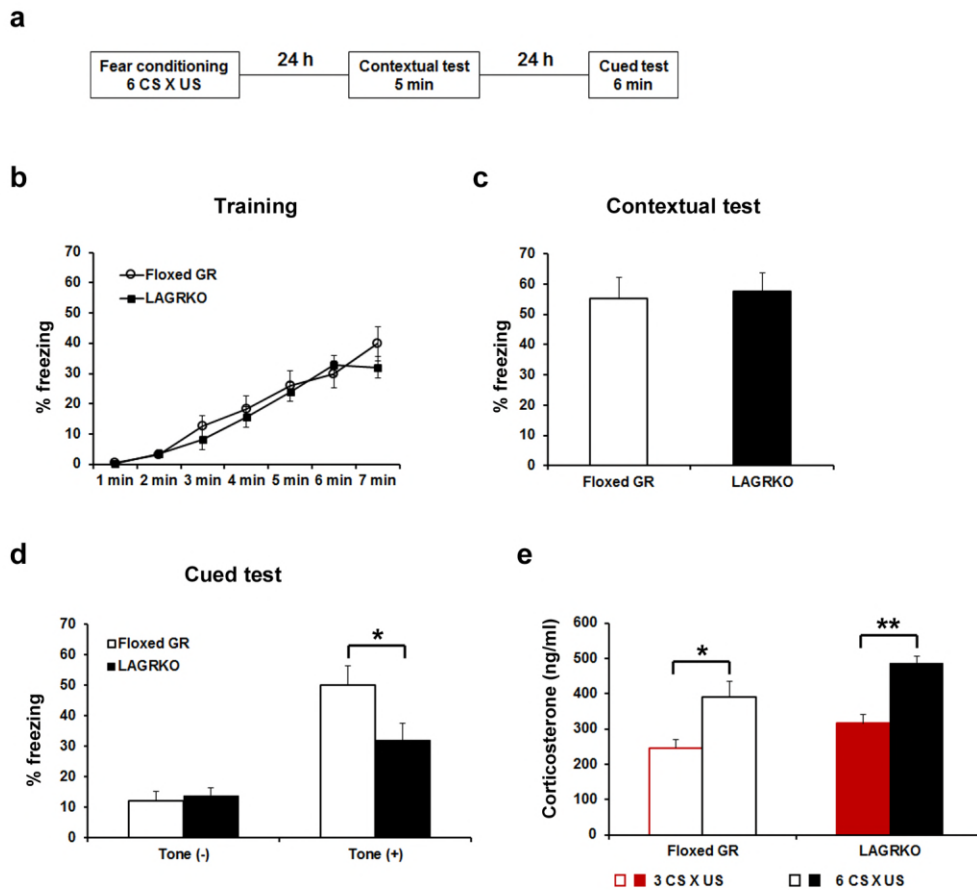

660

661 **Figure 3.** Genetic disruption of LAGR impairs auditory-cued fear memory following  
662 strengthened conditioning. (A) Experimental protocol for fear conditioning. Mice were  
663 trained with a protocol using six CS × US pairings. Contextual and auditory-cued fear  
664 memory were tested 24 and 48 h after training, respectively. Freezing levels during the  
665 training (B), contextual test (C), and cued test (D). During the cued test, LAGRKO  
666 mice (n = 10) exhibited significantly lower freezing levels in the presence of the tone  
667 than did floxed GR mice (n = 10). There was no significant difference in freezing levels

668 between the two genotypes during the training and contextual test. (E) Plasma  
669 corticosterone levels 90 min after training were significantly higher in mice conditioned  
670 with six CS × US pairings (n = 7) than in mice conditioned with 3 CS × US pairings (n  
671 = 6) in both genotypes. Data are presented as mean ± S. E. M. \* $p < 0.05$ , \*\* $p < 0.001$ .

672

673

674

675

676

677

678

679

680

681

682

683

684



## Figure 4

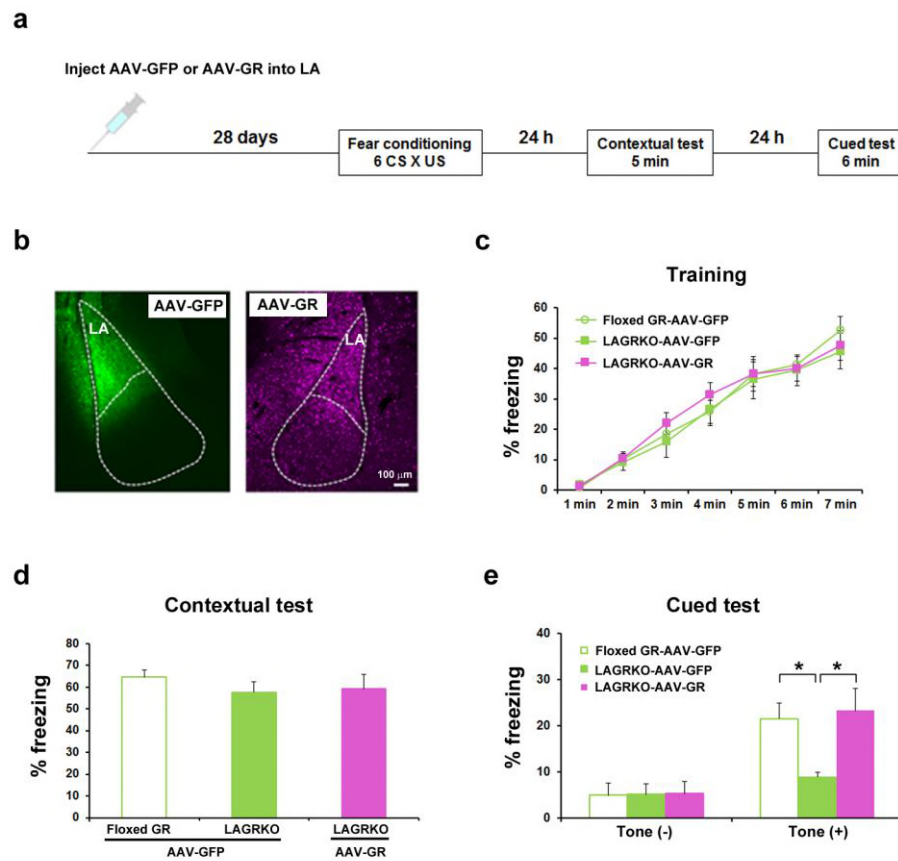

685

686 **Figure 4.** Rescue of the auditory-cued fear memory deficit in LAGRKO mice by  
687 restoring GR expression levels in the LA. (A) The experimental protocol for  
688 adeno-associated virus (AAV) vector injection and fear conditioning. (B) Representative  
689 images of the expression of green fluorescent protein (GFP, green) and GR (magenta) in  
690 the LA of LAGRKO mice injected with AAV-GFP or AAV-GR. The expression levels of  
691 GFP and GR were assessed after the behavioral test was completed. Freezing levels  
692 during the training (C), contextual test (D), and cued test (E). During the cued test,  
693 LAGRKO mice (n = 9) injected with AAV-GR and floxed GR injected with AAV-GFP

694 exhibited significantly higher levels of freezing in the presence of the tone than did  
695 AAV-GFP-injected LAGRKO mice (n = 9). There were no significant differences  
696 between the three groups during the training and contextual tests. Data are presented as  
697 mean  $\pm$  S. E. M. \* $p$  < 0.05.

698

699

700

701

702

703

704

705

706

707

708

709

710

711

**Figure 5**

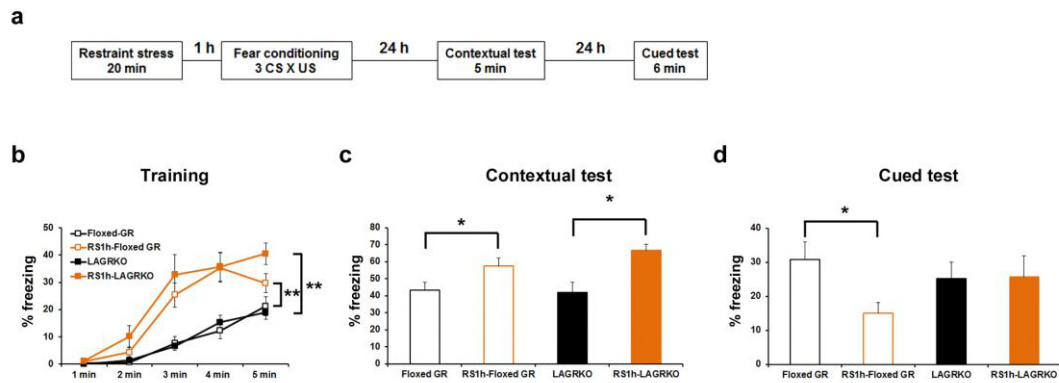

712

713 **Figure 5.** Effect of acute prior stress on auditory-cued fear conditioning. **(A)** The  
714 experimental design for prior restraint stress (RS) exposure and fear conditioning.  
715 Floxed GR and LAGRKO mice were exposed to a 20-min RS and fear-conditioned 1 h  
716 later. Contextual and auditory-cued fear memories were tested 24 and 48 h after training,  
717 respectively. **(B)** Mice exposed to RS 1 h before conditioning (brown, RS1h-Floxed GR,  
718 n = 11; RS1h-LAGRKO, n = 10) exhibited significantly higher freezing levels than did  
719 nonstressed mice (black, Floxed GR, n = 10; LAGRKO, n = 16) during the training  
720 session in both genotypes. **(C)** Mice exposed to RS exhibited significantly higher  
721 freezing levels than did nonstressed mice during the contextual fear memory test. **(D)**  
722 During the cued test, floxed GR mice exposed to RS 1 h before training exhibited  
723 significantly lower freezing levels than did the nonstressed floxed GR mice. Previous  
724 RS exposure had no effect on auditory-cued fear memory in LAGRKO mice. Data are  
725 presented as mean  $\pm$  S. E. M. \* $p < 0.05$ ; \*\* $p < 0.001$ .

Figure 6

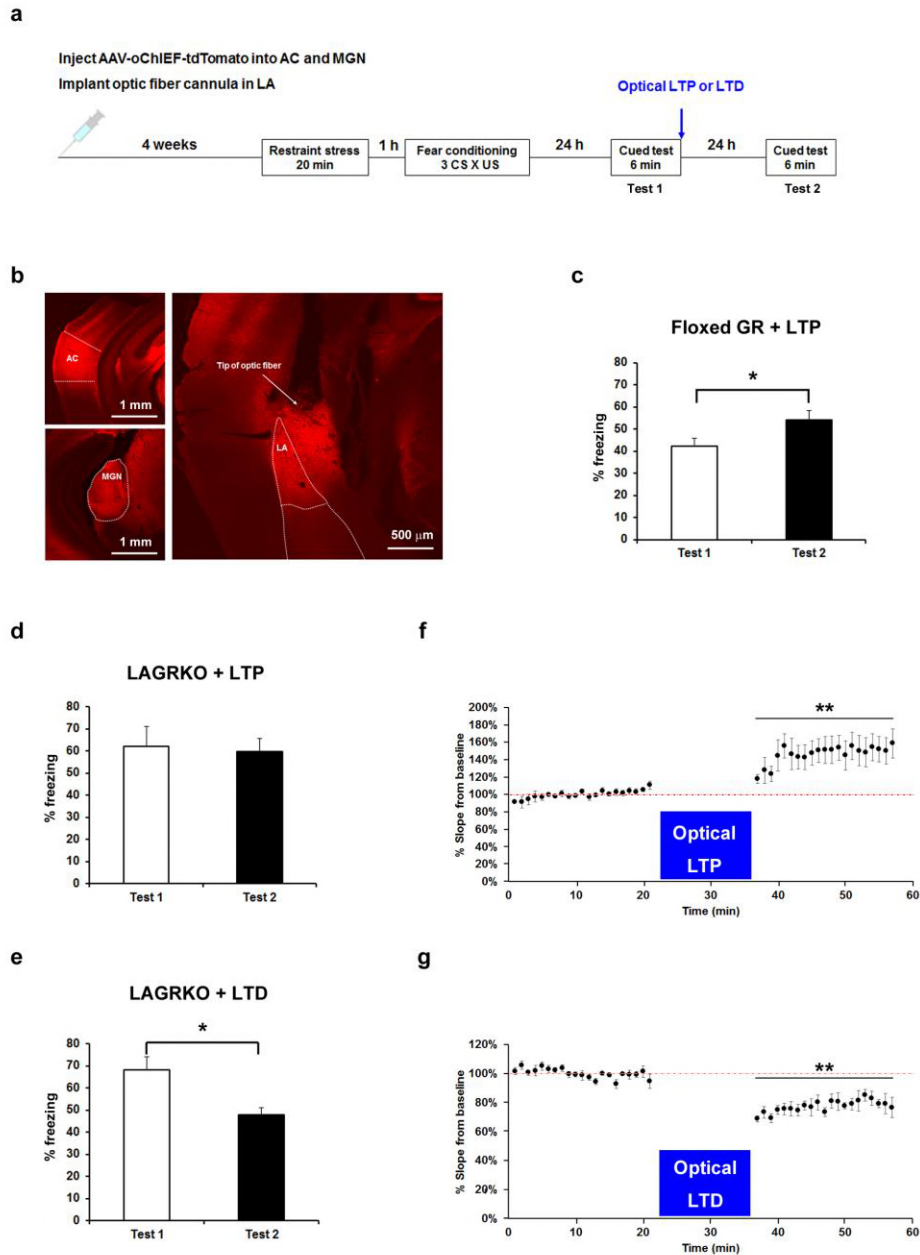

731 AAV-oChIEF-tdTomato 4 weeks after virus injection in the medial geniculate nucleus  
732 (MGN) and auditory cortex (AC). LA, lateral nucleus of the amygdala. (C) Floxed GR  
733 mice (n = 8) that received immediate optical LTP after the first auditory-cued fear  
734 memory test (Test 1) exhibited significantly increased freezing levels in the second  
735 auditory-cued fear memory test (Test 2). (D) LAGRKO mice (n = 8) that received  
736 optical LTP stimulation exhibited the same freezing levels in Tests 1 and 2. (E)  
737 LAGRKO mice (n = 8) that received LTD stimulation immediately after Test 1  
738 exhibited significantly lower freezing levels in Test 2 than in Test 1. Graphs show the  
739 freezing rate during the first 1 min of tone presentation at Tests 1 and 2. (F, G) A plot of  
740 the average of field EPSP slopes (normalized to the period before optical stimulation)  
741 before and after delivering an optical LTP (before LTP, 100.00% ± 0.87%; after LTP,  
742 146.34% ± 3.20%) or LTD (before LTD, 100.00% ± 0.61%; after LTD, 77.35% ± 0.99%).  
743 Data are obtained from four mice (two floxed GR and two LAGRKO mice). Data are  
744 presented as mean ± S. E. M. \**p* < 0.05, \*\**p* < 0.001.

745

746

747

748

## Supplementary Figure 1

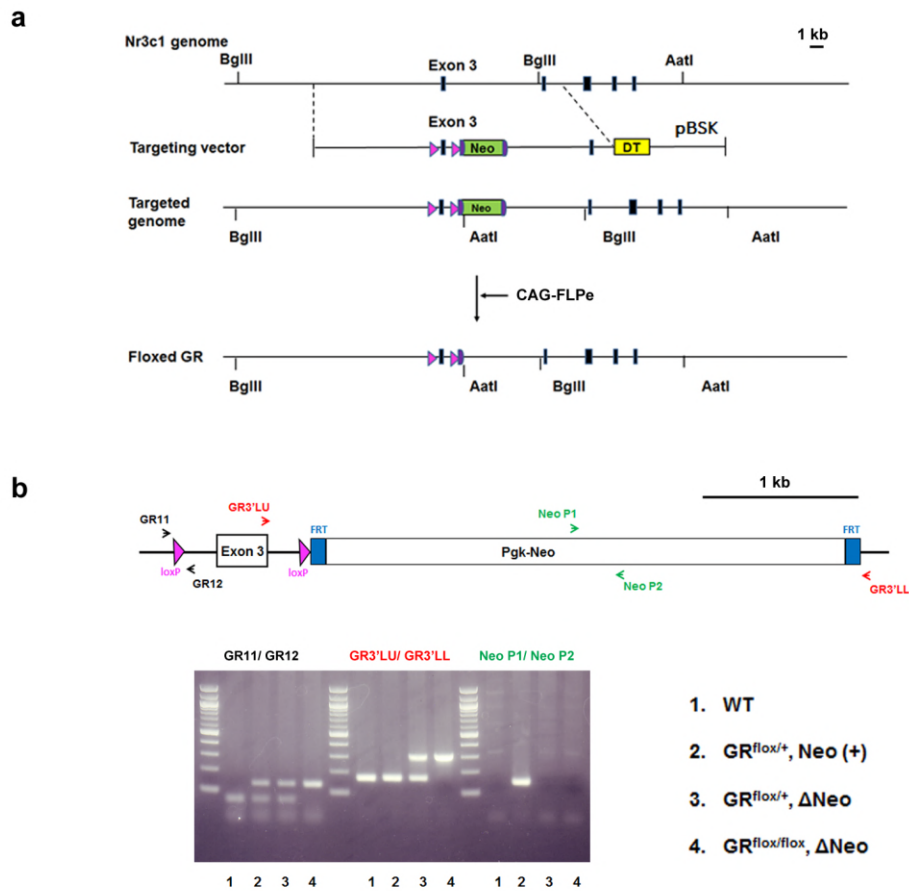

749

750 **Supplementary Figure 1.** Generation of floxed GR mice. (A) Strategy for targeting the

751 GR (*Nr3c1*) gene locus. The coding regions of GR exons are indicated by closed boxes.

752 The construct included two loxP sites and the pgk-neo genes flanked by two FRT sites.

753 DT, diphtheria toxin gene; pBSK, pBluescriptII SK; GR, glucocorticoid receptor. The

754 chimeric mice obtained were crossed with CAG-FLP mice to delete the pgk-neo

755 cassette and establish a floxed GR mouse line. (B) Genotyping PCR of genomic DNA

756 prepared from WT, GR<sup>flox/+</sup>, Neo (+), GR<sup>flox/+</sup>, ΔNeo, and GR<sup>flox/flox</sup>, ΔNeo mice. The

757 locations of PCR primers used are indicated.

758

759

### Supplementary figure 2

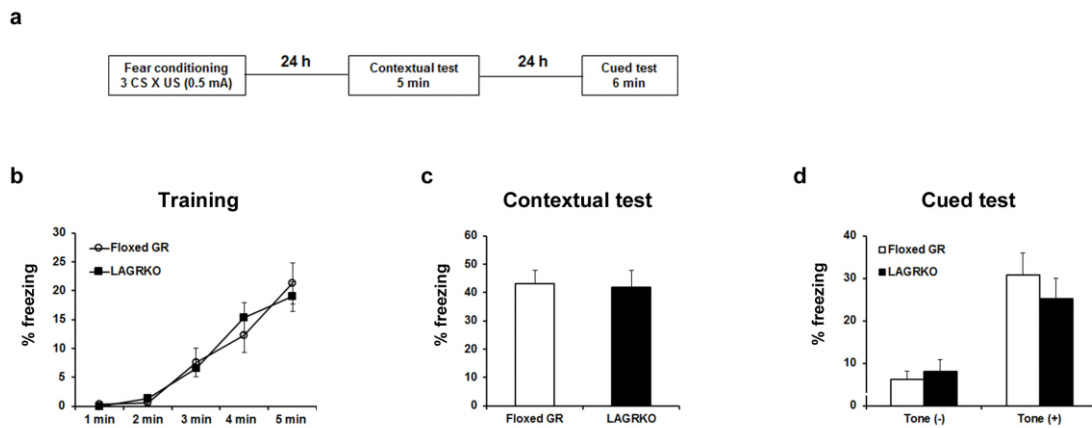

760

761 **Supplementary Figure 2.** LAGRKO mice did not exhibit fear memory deficits with the

762 moderate fear conditioning protocol. **(A)** Experimental design for fear conditioning.

763 Mice were trained with three CS  $\times$  US pairing protocol. Contextual and auditory fear

764 memories were tested 24 and 48 h after training, respectively. Freezing levels during the

765 training **(B)**, contextual test **(C)**, and cued test **(D)**. Data are presented as mean  $\pm$  S. E.

766 M. Floxed GR, n = 10; LAGRKO, n = 16. Data are presented as mean  $\pm$  S. E. M.

767

### Supplementary figure 3

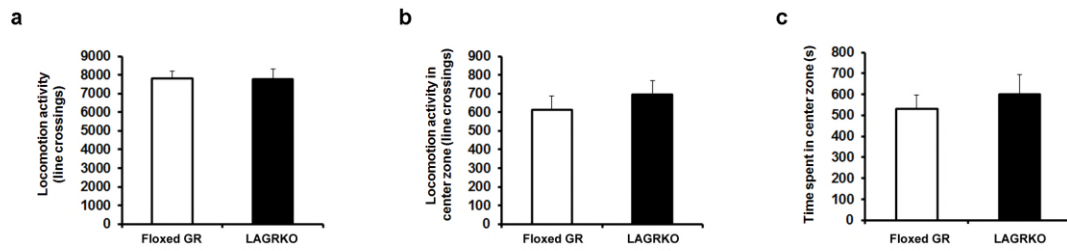

768

769 **Supplementary Figure 3.** LAGRKO mice exhibited no changes in locomotor activity

770 and anxiety level as determined using the open field test. Distance of travel throughout

771 the apparatus (**A**) and in the center zone of the open field (**B**) and time spent in the

772 center of the open field (**C**) did not differ between the two genotypes. Floxed GR, n =

773 15; LAGRKO, n = 10. Data are presented as mean  $\pm$  S. E. M.
